# Supplementary material
Source: MDPI journal article supplement (https://www.mdpi.com/2077-0472/12/11/1876)

## Supplementary material

Figure S1. Average monthly temperatures and monthly precipitation in 2019.

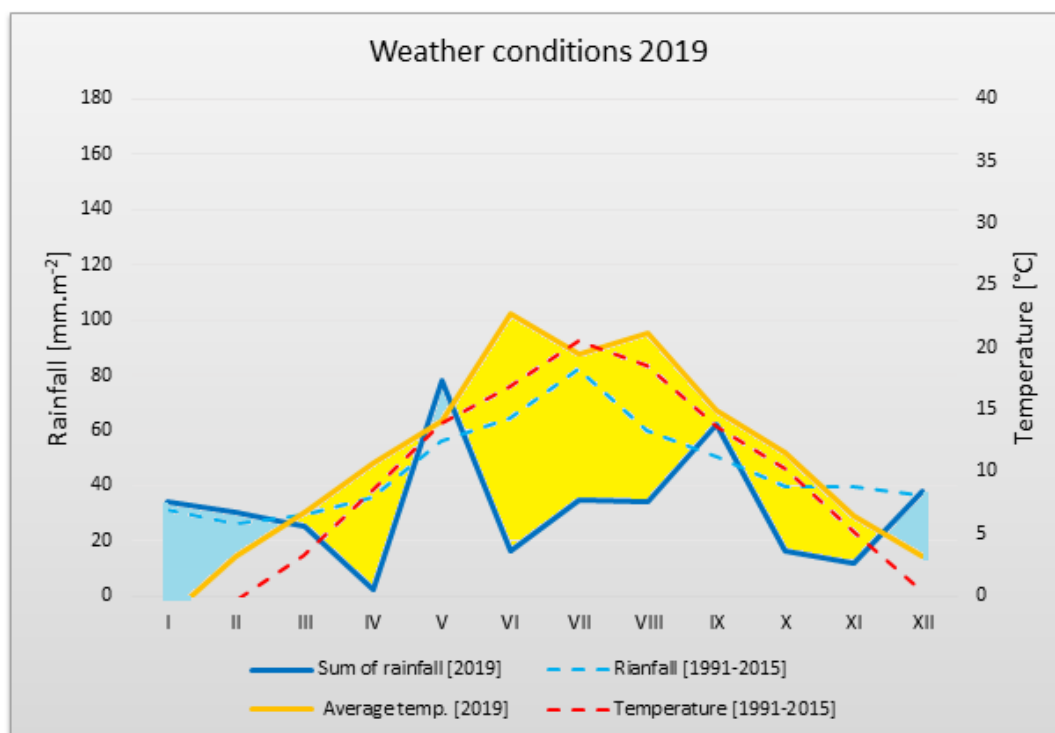

Figure S2. Average monthly temperatures and sum of monthly precipitation in 2020.

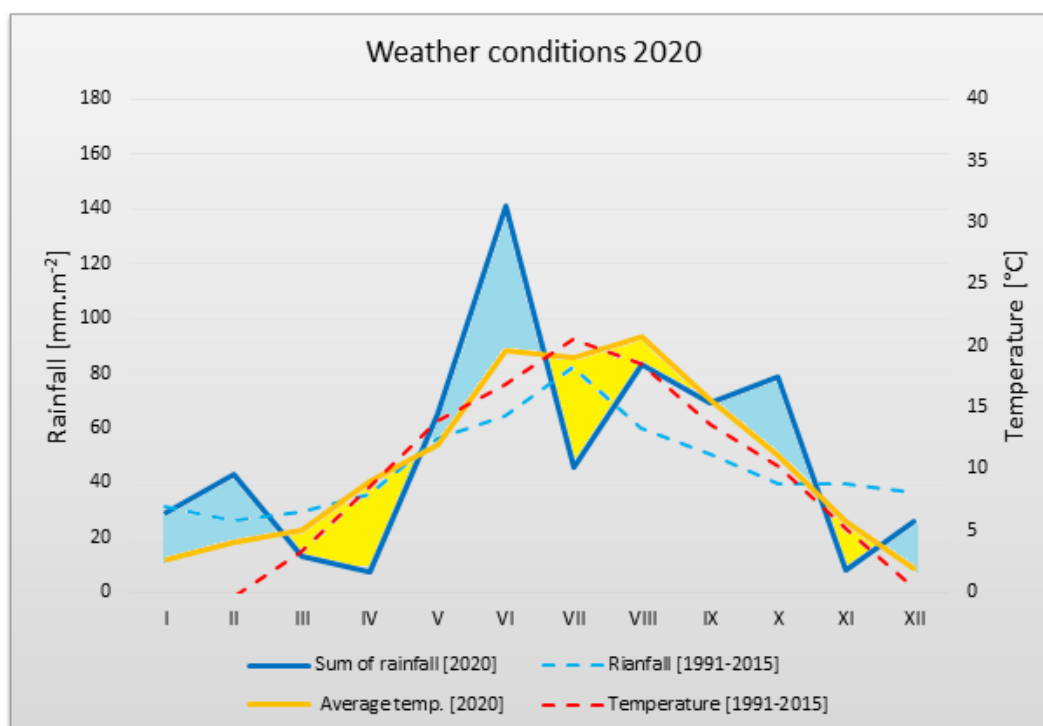

Figure S3. Average monthly temperatures and sum of monthly precipitation in 2021.

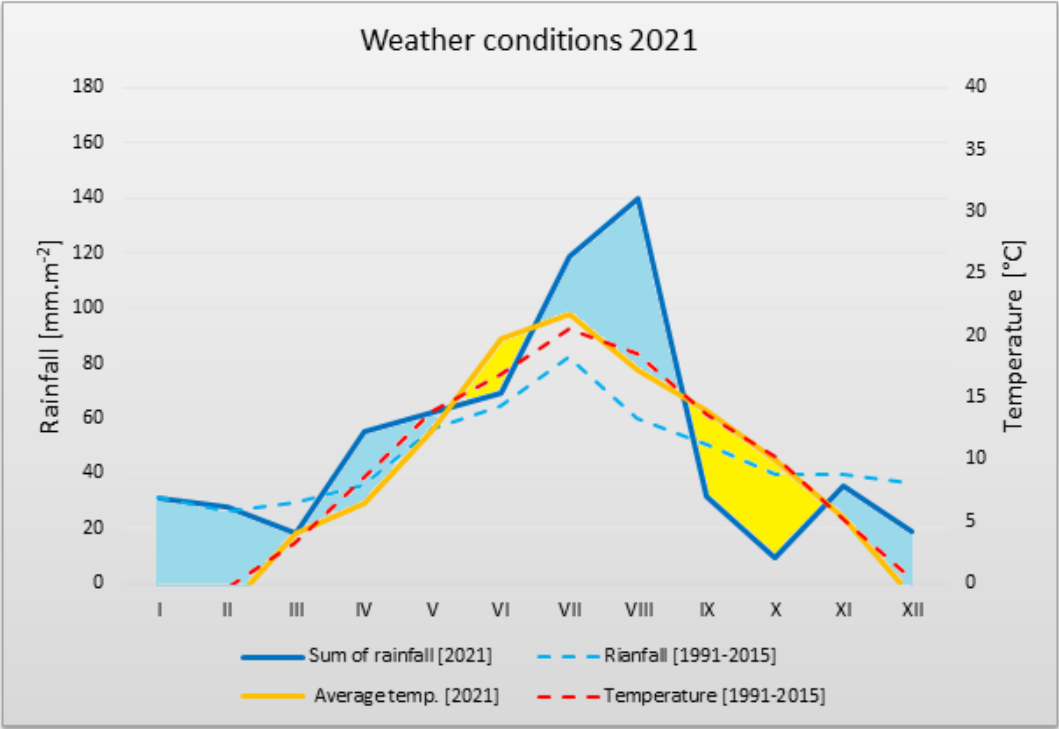

Supplement: s1 [file s1 › agriculture-1973908-supplementary.pdf]
